# Supplementary material
Source: PubMed Central journal article supplement (PMC3696559)

## SUPPLEMENTARY MATERIAL

### (Bonnefond A. *et al.* Loss-of-function mutations in *SIMI* contribute to obesity and Prader-Willi-Like-related features)

#### SUPPLEMENTARY METHODS

##### Study participants

*SIMI* was sequenced in:

- 44 children presenting with at least one clinical feature of PWL syndrome (including neonatal hypotonia, short hands, intellectual disability, developmental delay, behavioural problems, facial dysmorphism, hypogenitalism or hypogonadism (1)), that was either reported by the family, clinically apparent in clinic, or revealed only after detailed assessment. None of these children had chromosomal abnormality at chromosome 15q or 6q, or microdeletions elsewhere in the genome, as assessed by cytogenetic, array comparative genomic hybridization (via Agilent CGH array) and Prader-Willi syndrome DNA methylation analyses. All children were recruited by Lille hospital ( $N=1$ ; France), and the General Paediatric clinic/the Paediatric Endocrinology clinic/the Paediatric Genetics clinic at the University of Florida ( $N=43$ ; USA).
- 198 children with severe early-onset obesity, recruited by the CNRS UMR8199 unit ( $N=176$ ; France), and the General Paediatric clinic/the Paediatric Endocrinology clinic/the Paediatric Genetics clinic at the University of Florida ( $N=22$ ; USA).
- 568 morbidly obese adults, recruited by the CNRS UMR8199 unit ( $N=221$ ; France), the ABOS bariatric surgery study ( $N=48$ ; France) (2), the outpatient obesity clinic at

the University of Antwerp ( $N=64$ ; Belgium) (3) and a bariatric surgery study from Zurich ( $N=235$ ; Switzerland) (4).

- 383 normal weight French adults from the D.E.S.I.R. prospective study, fully described elsewhere (5).

Recruitment criteria for severe early-onset obesity were a history of weight  $>150\%$  of ideal BMI, or a BMI  $\geq 97^{\text{th}}$  percentile, according to the recommendations of the European Childhood Obesity Group study (6). The z-score of BMI was calculated as previously described (7). In adults, the obesity status was defined as: normal weight (BMI  $<25$  kg/m<sup>2</sup>), overweight ( $25 \leq \text{BMI} < 30$  kg/m<sup>2</sup>), obesity (BMI  $\geq 30$  kg/m<sup>2</sup>), severe obesity ( $30 \leq \text{BMI} < 40$  kg/m<sup>2</sup>) and morbid obesity (BMI  $\geq 40$  kg/m<sup>2</sup>).

When a rare mutation was identified, it was assessed by sequencing in carriers' relatives (when DNA was available).

### **Sequencing of *SIMI***

*SIMI* is located on human chromosome 6q16.3-q21 and encodes a 766-amino-acid protein (NM\_005068→NP\_005059). Genomic DNA was amplified by PCR with primers designed to cover the 11 exons and flanking intron-exon boundaries of *SIMI*. Fragments were bidirectionally sequenced using the automated 3730xl DNA Analyzer (Applied Biosystems). Electrophoregram reads were assembled and analyzed using Sequencher software. We only analysed non-synonymous variants observed with a frequency  $<1\%$ .

### **HRM genotyping**

We genotyped seven variants (p.T46R, p.E62K, p.Q152E, p.H323Y, p.R581G, p.T714A and p.D740H) in 2,896 normal weight French individuals from the D.E.S.I.R. study, using the HRM technology (Roche), as previously described (8).

### **In Silico functional prediction software**

Polyphen-2 (9), SNAP (10), SIFT (11), PMut (12) and Align GVGD (13) programs were used to predict the possible impact of an amino acid substitution on the structure and function of SIM1. Codes per software are (from lowest damaging risk to highest damaging risk):

- For Polyphen-2 (9), “benign” → “possibly damaging” → “probably damaging”
- For SNAP (10), “neutral” → “non neutral”
- For SIFT (11), “tolerated” → “damaging”
- For PMut (12), “neutral” → “pathological”
- For Align GVGD (13), “C0” (risk estimates between 1.10 and 1.33) → “C15” → “C25” → “C35” → “C45” → “C55” → “C65” (risk estimates > 3.00)

### **Homology modeling**

Homology modeling was carried out with the ICM-Pro program suite (14) using the homology add-on (15; 16). Each model of the heterodimer was first created individually using the sequence for human SIM1 residues 1-225 (Uniprot number: P81133) and for human ARNT2 residues 1-330 (Uniprot number: Q9HBZ2) so as to include the bHLH and PASA domains of each protein. Using the protein data bank (PDB), we found that the CLOCK:BMAL1 structure was the closest homologous structure (PDB ID: 4F3L) (17). Therefore, a homology model of SIM1 was created using the CLOCK protein as a three-dimensional template and the ARNT2 model was created using BMAL1 as a three-dimensional model. After creation of the individual models, they were subject to regularization and model refinement using ICM-Pro (to optimize model geometry, carry out energy minimization, and alleviate clashing side-chains). The two structures were then docked using the CLOCK:BMAL1 structure as a guide. Further regularization and model refinement were then performed to ensure the integrity of the dimer interface. Finally, several loops were

subject to loop modeling to improve clashing at the dimer interface using the ICM-Pro loop modeling utility (18). Figures were created using PyMOL (The PyMOL Molecular Graphics System, Version 1.2r3pre, Schrödinger, LLC). Of note, as crystal structures showed very different PASB interactions for HIF:ARNT PASB (19), CLOCK:BMAL1 PASB (17) and the PER PASA PASB homodimer (20), we have not attempted modeling beyond the PASA domain. Furthermore, modeling is not possible for the C-terminus as there are no structures of this region for any member of the protein family.

### **Plasmid construction per mutation**

Details of all primers used in this section are available upon request.

pDR2-hSIM1 and pML-6CWT were a kind gift from Dr. S.E. Antonarakis (Geneva University) and Dr. J. Pelletier (McGill University), respectively.

pEF-hARNT-IRES-neo has been previously described (21).

pEF-hARNT2-IRES-neo was constructed by PCR amplifying full-length human ARNT2 from 293T cDNA, digesting with MluI/XbaI and ligating into similarly digested pEF-IRES-neo.

For the generation of stable cell lines, full-length human SIM1 with two in-frame C-terminal Myc tags was generated. First, pEF-hSIM1-IRES-puro was constructed by digesting full-length hSIM1 out of pDR2-hSIM1 with AflII, blunt-ending with Klenow, and ligating into EcoRV digested pEF-IRES-puro6 (22). Then, SIM1 was PCR amplified from this vector, digested with ClaI/HpaI and ligated into ClaI/EcoRV digested pEF-mSIM2L-Myc-IRES-puro (23). This ligated the hSIM1 coding sequence in-frame with the existing 2XMyc tag to create pEF-hSIM1-Myc-IRES-puro. pcDNA5-FRT-TO-hSIM1-Myc was constructed by ligating the NheI/NotI fragment from pEF-hSIM1-Myc-IRES-puro into similarly digested pcDNA5-FRT-TO-hSIM2s-Myc. pcDNA5-FRT-TO-hSIM2s-Myc was itself constructed by ligating the

AflII/NotI fragment from pEF-hSIM2s-Myc-IRES-puro into similarly digested pcDNA5-FRT-TO (Invitrogen).

Point mutations within the hSIM1 coding sequence were then introduced into pcDNA5-FRT-TO-hSIM1-Myc as follows:

- p.T46R (ACG>AGG): overlap extension PCR.
- p.E62K (GAG>AAG): overlap extension PCR.
- p.I128T (ATT>ACT): overlap extension PCR.
- p.Q152E (CAG>GAG): overlap extension PCR.
- p.H323Y (CAC>TAC): the NheI/BamHI fragment was digested out of pcDNA3-hSIM1-p.H323Y (mutation was generated using the QuikChange site-directed mutagenesis kit (Stratagene)) and ligated into similarly digested pcDNA5-FRT-TO-hSIM1-Myc.
- p.R581G (AGA>GGA): the EcoRV/PshAI fragment was digested out of pcDNA3-hSIM1-p.R581G (mutagenesis performed as above) and ligated into similarly digested pEF-hSIM1-Myc-IRES-puro. Then the NheI/NotI fragment was digested out and ligated into similarly digested pcDNA5-FRT-TO-hSIM1-Myc.
- p.T714A (ACT>GCT): PCR amplified from pcDNA3-hSIM1-p.T714A (mutagenesis performed as above) and ligated into full-length hSIM1 in pGEM-T-Easy (Promega) using EcoRV/HpaI. Full-length hSIM1-p.T714A then subcloned into ClaI/EcoRV digested pEF-mSIM2L-Myc-IRES-puro using ClaI/HpaI, and finally subcloned into pcDNA5-FRT-TO using NheI/NotI.
- p.D740H (GAT>CAT): overlap extension PCR.

### **Generation of stable cell lines, cell culture, and transfection**

The human embryonic kidney 293 Flp-In T-Rex cell system (Invitrogen) was used to generate a doxycycline-inducible stable cell line for each SIM1 mutant, as well as two independently derived SIM1 wild type cell lines and one control (empty vector) cell line, as per manufacturer's instructions. Transfections were performed on subconfluent cells using Fugene6 (Roche).

### **Luciferase reporter assays**

Cells were plated at 40-50% confluency in 24-well tray format and transfected with 400ng pML-6CWT, 0.5ng phRL-CMV (Promega), and 20ng pEF-hARNT-IRES-neo or 50ng pEF-hARNT2-IRES-neo using Fugene6 (Roche). pML-6CWT is a SIM1-responsive Firefly Luciferase reporter plasmid controlled by six consecutive repeats of the CME from the toll promoter (24). Six hours after transfection, medium was replaced with fresh medium containing doxycycline (Sigma) to a final concentration of 1 $\mu$ g/mL. Cells were harvested after 16 hours doxycycline treatment and assayed for luciferase activity using the Dual Luciferase Assay System (Promega) and a Glomax Luminometer (Promega) as per manufacturer's instructions. Empty vector, wild type and mutant cell lines were assayed in triplicate in at least three independent experiments. Firefly luciferase activity was normalised to Renilla luciferase activity for each well, and the three normalised values were averaged. In the case of the two wild type lines, the Firefly/Renilla values for all six wells were combined into a single average value. These figures were then converted to log values for the purposes of statistical analysis. Data displayed are the mean Firefly/Renilla value +SEM for each cell type ( $n=3$  for all mutants except p.Q152E  $n=5$ , empty vector and wild type  $n=9$ ) expressed relative to wild type, which, for the purposes of clarity, has been normalised to 100%. All luciferase data are shown in **Supplementary Table 4**.

## Western analysis

Cells were stimulated in complete medium supplemented with 1µg/mL doxycycline for 16 hours. Whole cell extracts were prepared as previously described (25). 30µg of whole cell extracts were subjected to 7.5% SDS-PAGE and transferred to nitrocellulose using a Mini Trans-Blot Electrophoretic Transfer Cell (Bio-Rad). Proteins were detected with the anti-Myc 4A6 monoclonal antibody (Millipore). The anti-alpha tubulin monoclonal antibody MCA78G (AbD Serotec) was used as a loading control.

## SUPPLEMENTARY REFERENCES

1. Bonaglia MC, Ciccone R, Gimelli G, Gimelli S, Marelli S, Verheij J, Giorda R, Grasso R, Borgatti R, Pagone F, Rodriguez L, Martinez-Frias ML, van Ravenswaaij C, Zuffardi O: Detailed phenotype-genotype study in five patients with chromosome 6q16 deletion: narrowing the critical region for Prader-Willi-like phenotype. *Eur J Hum Genet* 16:1443-1449, 2008
2. Poulain-Godefroy O, Lecoeur C, Pattou F, Fruhbeck G, Froguel P: Inflammation is associated with a decrease of lipogenic factors in omental fat in women. *Am J Physiol Regul Integr Comp Physiol* 295:R1-7, 2008
3. Peeters A, Beckers S, Verrijken A, Roevens P, Peeters P, Van Gaal L, Van Hul W: Variants in the FTO gene are associated with common obesity in the Belgian population. *Mol Genet Metab* 93:481-484, 2008
4. Steffen R, Potoczna N, Bieri N, Horber FF: Successful multi-intervention treatment of severe obesity: a 7-year prospective study with 96% follow-up. *Obes Surg* 19:3-12, 2009
5. Balkau B: [An epidemiologic survey from a network of French Health Examination Centres, (D.E.S.I.R.): epidemiologic data on the insulin resistance syndrome]. *Rev Epidemiol Sante Publique* 44:373-375, 1996
6. Rolland-Cachera MF, Cole TJ, Sempe M, Tichet J, Rossignol C, Charraud A: Body Mass Index variations: centiles from birth to 87 years. *Eur J Clin Nutr* 45:13-21, 1991
7. Stutzmann F, Vatin V, Cauchi S, Morandi A, Jouret B, Landt O, Tounian P, Levy-Marchal C, Buzzetti R, Pinelli L, Balkau B, Horber F, Bougneres P, Froguel P, Meyre D: Non-synonymous polymorphisms in melanocortin-4 receptor protect against obesity: the two facets of a Janus obesity gene. *Hum Mol Genet* 16:1837-1844, 2007
8. Bonnefond A, Clement N, Fawcett K, Yengo L, Vaillant E, Guillaume JL, Dechaume A, Payne F, Roussel R, Czernichow S, Hercberg S, Hadjadj S, Balkau B, Marre M, Lantieri O, Langenberg C, Bouatia-Naji N, Charpentier G, Vaxillaire M, Rocheleau G, Wareham NJ, Sladek R, McCarthy MI, Dina C, Barroso I, Jockers R, Froguel P: Rare MTNR1B variants impairing melatonin receptor 1B function contribute to type 2 diabetes. *Nat Genet* 44:297-301, 2012
9. Adzhubei IA, Schmidt S, Peshkin L, Ramensky VE, Gerasimova A, Bork P, Kondrashov AS, Sunyaev SR: A method and server for predicting damaging missense mutations. *Nat Methods* 7:248-249, 2010

10. Bromberg Y, Rost B: SNAP: predict effect of non-synonymous polymorphisms on function. *Nucleic Acids Res* 35:3823-3835, 2007
11. Ng PC, Henikoff S: SIFT: Predicting amino acid changes that affect protein function. *Nucleic Acids Res* 31:3812-3814, 2003
12. Ferrer-Costa C, Gelpi JL, Zamakola L, Parraga I, de la Cruz X, Orozco M: PMUT: a web-based tool for the annotation of pathological mutations on proteins. *Bioinformatics* 21:3176-3178, 2005
13. Tavtigian SV, Deffenbaugh AM, Yin L, Judkins T, Scholl T, Samollow PB, de Silva D, Zharkikh A, Thomas A: Comprehensive statistical study of 452 BRCA1 missense substitutions with classification of eight recurrent substitutions as neutral. *J Med Genet* 43:295-305, 2006
14. Abagyan R, Totrov M, Kuznetsov D: ICM—A new method for protein modeling and design: Applications to docking and structure prediction from the distorted native conformation. *J Comput Chem* 15:488–506, 1994
15. Cardozo T, Totrov M, Abagyan R: Homology modeling by the ICM method. *Proteins* 23:403-414, 1995
16. Abagyan R, Batalov S, Cardozo T, Totrov M, Webber J, Zhou Y: Homology modeling with internal coordinate mechanics: deformation zone mapping and improvements of models via conformational search. *Proteins Suppl* 1:29-37, 1997
17. Huang N, Chelliah Y, Shan Y, Taylor CA, Yoo SH, Partch C, Green CB, Zhang H, Takahashi JS: Crystal structure of the heterodimeric CLOCK:BMAL1 transcriptional activator complex. *Science* 337:189-194, 2012
18. Arnautova YA, Abagyan RA, Totrov M: Development of a new physics-based internal coordinate mechanics force field and its application to protein loop modeling. *Proteins* 79:477-498, 2011
19. Scheuermann TH, Tomchick DR, Machius M, Guo Y, Bruick RK, Gardner KH: Artificial ligand binding within the HIF2alpha PAS-B domain of the HIF2 transcription factor. *Proc Natl Acad Sci U S A* 106:450-455, 2009
20. King HA, Hoelz A, Crane BR, Young MW: Structure of an enclosed dimer formed by the *Drosophila* period protein. *J Mol Biol* 413:561-572, 2011
21. Woods S, Farrall A, Procko C, Whitelaw ML: The bHLH/Per-Arnt-Sim transcription factor SIM2 regulates muscle transcript myomesin2 via a novel, non-canonical E-box sequence. *Nucleic Acids Res* 36:3716-3727, 2008
22. Hobbs S, Jitrapakdee S, Wallace JC: Development of a bicistronic vector driven by the human polypeptide chain elongation factor 1alpha promoter for creation of stable mammalian cell lines that express very high levels of recombinant proteins. *Biochem Biophys Res Commun* 252:368-372, 1998
23. Woods SL, Whitelaw ML: Differential activities of murine single minded 1 (SIM1) and SIM2 on a hypoxic response element. Cross-talk between basic helix-loop-helix/per-Arnt-Sim homology transcription factors. *J Biol Chem* 277:10236-10243, 2002
24. Wharton KA, Jr., Franks RG, Kasai Y, Crews ST: Control of CNS midline transcription by asymmetric E-box-like elements: similarity to xenobiotic responsive regulation. *Development* 120:3563-3569, 1994
25. Whitelaw M, Pongratz I, Wilhelmsson A, Gustafsson JA, Poellinger L: Ligand-dependent recruitment of the Arnt coregulator determines DNA recognition by the dioxin receptor. *Mol Cell Biol* 13:2504-2514, 1993



**SUPPLEMENTARY TABLE 1. Clinical characteristics of *SIMI* mutated probands presenting with PWL syndrome**

| Proband | Variant | Age (yrs) | Gender | Z-score of BMI | Intellectual disability | Developmental delay                                    | Behaviour* | Facial dysmorphism** | Short hands | Hypotonia | Hypogonadism                                                         |
|---------|---------|-----------|--------|----------------|-------------------------|--------------------------------------------------------|------------|----------------------|-------------|-----------|----------------------------------------------------------------------|
| 1       | p.I128T | 5         | F      | 6.9            | +                       | +                                                      | +          | -                    | -           | -         | -                                                                    |
| 2       | p.Q152E | 4         | F      | 7.7            | +(IQ=97)                | -                                                      | +          | +                    | -           | -         | +(hypoplastic clitoris and labia minora)                             |
| 3       | p.R581G | 19        | F      | 5.2            | +(IQ=53)                | +(sat: 18m; spoke: 24m; walked: 36m)                   | +          | +                    | -           | -         | +(No menses; no clitoris and labia minora; hypoplastic labia majora) |
| 4       | p.T714A | 1.5       | M      | 7.7            | +                       | +(sat: 10m; spoke: never understandable; walked: 4yrs) | +          | +                    | -           | -         | -                                                                    |

*F*, female; *M*, male; *BMI*, body mass index; *yrs*, years; *m*, months

\*Behavioural problems: temper tantrums and/or self-injurious behaviour (e.g. skin-picking)

\*\*Facial dysmorphism: round face with small nose and depressed nasal bridge

**SUPPLEMENTARY TABLE 2. Clinical characteristics of morbidly obese adults carrying a rare variant in *SIMI***

| <b>Carrier</b> | <b>Variant</b> | <b>Age (yrs)</b> | <b>Gender</b> | <b>BMI</b> | <b>Other clinical features</b> |
|----------------|----------------|------------------|---------------|------------|--------------------------------|
| 1              | p.T46R         | 40               | F             | 57.3       | -                              |
| 2              | p.T46R         | 32               | F             | 56.2       | Developmental delay            |
| 3              | p.T46R         | 38               | M             | 52.5       | Developmental delay            |
| 4              | p.T46R         | 46               | F             | 53.5       | -                              |
| 5              | p.E62K         | 38               | F             | 52.2       | -                              |
| 6              | p.H323Y        | 54               | F             | 47.1       | -                              |
| 7              | p.D740H        | 36               | F             | 66.0       | -                              |

*F*, female; *M*, male; *BMI*, body mass index; *yrs*, years

**SUPPLEMENTARY TABLE 3. Clinical characteristics of the family with PWL-associated clinical features, and carrying the *SIMI* p.T714A mutation**

| Family member        | z-score of BMI | Age at onset of obesity (yrs) | Hyperphagia | Cognitive impairment/ learning disabilities | Developmental delay                                          | Facial dysmorphism* | Behavioural problems** | Hypogonadism           |
|----------------------|----------------|-------------------------------|-------------|---------------------------------------------|--------------------------------------------------------------|---------------------|------------------------|------------------------|
| <b>Proband</b>       | 7.7            | 1.5                           | yes         | yes                                         | yes<br>(sat: 10m; spoke: never understandable; walked: 4yrs) | mild                | yes                    | no                     |
| <b>Sister 1</b>      | 7.4            | 2.5                           | yes         | yes                                         | mild<br>(spoke: needs orthophonist; walked: 16m)             | mild                | yes                    | no                     |
| <b>Brother</b>       | 2.0            | 2                             | yes         | yes                                         | yes<br>(spoke: needs orthophonist, walked: 18m)              | mild                | yes                    | no                     |
| <b>Sister 2</b>      | 3.2            | 4                             | yes         | mild                                        | no                                                           | mild                | no                     | no<br>(hyperandrogeny) |
| <b>Mother</b>        | 2.9            | 20                            | no          | yes                                         | NA                                                           | mild                | no                     | no                     |
| <b>Maternal aunt</b> | 1.7            | -                             | no          | no                                          | NA                                                           | no                  | no                     | no                     |

*BMI*, body mass index; *yrs*, years; *m*, months

\*Facial dysmorphism: round face with small nose and depressed nasal bridge

\*\*Behavioural problems: temper tantrums and/or self-injurious behaviour (skin-picking)

**SUPPLEMENTARY TABLE 4. Luciferase data showing the effect of *SIM1* substitutions on the transcriptional activity of SIM1**

For each experiment date, the "average" value is the average of a triplicate transfections FireflyLuc/Renilla Luc. Similarly, each "stdev" value is the stdev of a triplicate. The WT value in each experiment is the average of the 6 raw values collected for independent cell lines WT1 and WT2 in that experiment. Similarly the WT stdev is the stdev of the 6 values collected for WT1 and WT2 in that experiment.

| Date     |         | average     | stdev       | fold change | %WT     | Date        |             | average     | stdev       | fold change | %WT    |        |
|----------|---------|-------------|-------------|-------------|---------|-------------|-------------|-------------|-------------|-------------|--------|--------|
| 25/02/10 | ARNT    | empty       | 0,00043     | 2,00719E-05 | 1       | 27/05/10    | ARNT        | empty       | 0,00095     | 0,000163926 | 1      | 0,0197 |
|          |         | WT          | 0,02502     | 0,000628888 | 58,29   |             |             | WT          | 0,04843     | 0,006349825 | 50,72  | 1      |
|          |         | I128T       | 0,02043     | 0,000737236 | 47,60   |             |             | I128T       | 0,04469     | 0,000844173 | 46,80  | 0,9228 |
|          | ARNT2   | empty       | 0,00044     | 1,02814E-05 | 1       |             | Q152E       | 0,03629     | 0,003296636 | 38,00       | 0,7493 |        |
|          |         | WT          | 0,00633     | 0,000385835 | 14,41   |             | H323Y       | 0,02232     | 0,002482495 | 23,37       | 0,4609 |        |
|          |         | I128T       | 0,00474     | 5,26473E-05 | 10,78   |             | R581G       | 0,04970     | 0,002222249 | 52,04       | 1,0262 |        |
| 02/03/10 | ARNT    | empty       | 0,00090     | 1,86498E-05 | 1       | T714A       | 0,02743     | 0,000425058 | 28,73       | 0,5664      |        |        |
|          |         | WT          | 0,03476     | 0,007268399 | 38,48   | ARNT2       | empty       | 0,00099     | 7,14835E-05 | 1           | 0,0620 |        |
|          |         | I128T       | 0,03820     | 0,001901873 | 42,29   |             | WT          | 0,01594     | 0,000624682 | 16,13       | 1      |        |
|          | Q152E   | 0,02119     | 0,00083006  | 23,46       | I128T   |             | 0,01346     | 0,001119041 | 13,62       | 0,8447      |        |        |
|          | ARNT2   | empty       | 0,00100     | 4,96408E-05 | 1       | Q152E       | 0,01128     | 0,000850405 | 11,41       | 0,7076      |        |        |
|          |         | WT          | 0,01025     | 0,001471553 | 10,22   | H323Y       | 0,00662     | 0,000477633 | 6,69        | 0,4151      |        |        |
| I128T    |         | 0,01011     | 0,000617858 | 10,09       | R581G   | 0,01867     | 0,000845917 | 18,90       | 1,1717      |             |        |        |
| Q152E    | 0,00662 | 0,000355365 | 6,60        | T714A       | 0,00968 | 0,000186265 | 9,80        | 0,6075      |             |             |        |        |
| 05/03/10 | ARNT    | empty       | 0,00057     | 6,8858E-05  | 1       | 24/06/11 #1 | ARNT        | empty       | 0,00054     | 6,95293E-05 | 1      | 0,0266 |
|          |         | WT          | 0,02605     | 0,006186361 | 45,70   |             |             | WT          | 0,02025     | 0,004452646 | 37,65  | 1      |
|          |         | I128T       | 0,01805     | 0,002198308 | 31,67   |             |             | T46R        | 0,00072     | 4,29144E-05 | 1,34   | 0,0357 |
|          | ARNT2   | empty       | 0,00063     | 3,42806E-05 | 1       |             | E62K        | 0,03358     | 0,002569191 | 62,44       | 1,6585 |        |
|          |         | WT          | 0,00880     | 0,002257478 | 14,07   |             | D740H       | 0,03671     | 0,000291338 | 68,26       | 1,8132 |        |
|          |         | I128T       | 0,00444     | 0,000821157 | 7,10    |             | ARNT2       | empty       | 0,00059     | 2,27297E-05 | 1      | 0,0723 |
| Q152E    | 0,00722 | 0,000244091 | 11,54       | WT          | 0,00823 | 0,000792752 |             | 13,84       | 1           |             |        |        |
|          |         |             |             | T46R        | 0,00081 | 3,86967E-05 |             | 1,35        | 0,0978      |             |        |        |
| 04/05/10 | ARNT    | empty       | 0,00070     | 2,69562E-05 | 1       | E62K        | 0,00983     | 0,00080875  | 16,53       | 1,1943      |        |        |
|          |         | WT          | 0,03019     | 0,004201944 | 43,41   | D740H       | 0,00896     | 0,000280238 | 15,07       | 1,0893      |        |        |
|          |         | I128T       | 0,03113     | 0,002344889 | 44,76   | 24/06/11 #2 | ARNT        | empty       | 0,00064     | 2,39818E-05 | 1      | 0,0343 |
|          | Q152E   | 0,02618     | 0,001221121 | 37,64       | WT      |             |             | 0,01868     | 0,005465252 | 29,13       | 1      |        |
|          | H323Y   | 0,00785     | 0,003563751 | 11,29       | T46R    |             |             | 0,00075     | 1,67651E-05 | 1,16        | 0,0399 |        |
|          | ARNT2   | empty       | 0,00055     | 2,5411E-05  | 1       |             | E62K        | 0,03056     | 0,002214768 | 47,67       | 1,6363 |        |
| WT       |         | 0,00750     | 0,002194624 | 13,70       | D740H   |             | 0,03200     | 0,00283445  | 49,90       | 1,7131      |        |        |
| I128T    |         | 0,00549     | 0,000512928 | 10,03       | ARNT2   |             | empty       | 0,00075     | 2,2055E-05  | 1           | 0,0757 |        |
| Q152E    | 0,00632 | 0,000447827 | 11,54       | WT          |         | 0,00986     | 0,00103506  | 13,21       | 1           |             |        |        |
| H323Y    | 0,00254 | 0,000386828 | 4,63        | T46R        |         | 0,00089     | 7,72051E-06 | 1,19        | 0,0900      |             |        |        |
| R581G    | 0,00645 | 0,000860257 | 11,77       | E62K        | 0,01086 | 0,000617686 | 14,55       | 1,1018      |             |             |        |        |
| T714A    | 0,00467 | 0,000556563 | 8,53        | D740H       | 0,00955 | 0,000399467 | 12,80       | 0,9689      |             |             |        |        |
| 19/05/10 | ARNT    | empty       | 0,00084     | 0,000163926 | 1       | 24/06/11 #3 | ARNT        | empty       | 0,00049     | 1,04268E-05 | 1      | 0,0275 |
|          |         | WT          | 0,03193     | 0,00410374  | 37,89   |             |             | WT          | 0,01792     | 0,001021704 | 36,42  | 1      |
|          |         | Q152E       | 0,03308     | 0,003296636 | 39,25   |             |             | T46R        | 0,00060     | 3,23995E-05 | 1,21   | 0,0332 |
|          | ARNT2   | empty       | 0,00081     | 7,14835E-05 | 1       |             | E62K        | 0,02507     | 8,17332E-05 | 50,95       | 1,3990 |        |
|          |         | WT          | 0,01040     | 0,001353896 | 12,79   |             | D740H       | 0,02340     | 0,001124947 | 47,55       | 1,3056 |        |
|          |         | Q152E       | 0,00918     | 0,000850405 | 11,29   |             | ARNT2       | empty       | 0,00049     | 3,66632E-06 | 1      | 0,0820 |
| H323Y    | 0,00370 | 0,000477633 | 4,55        | WT          | 0,00592 | 0,000661355 |             | 12,19       | 1           |             |        |        |
| R581G    | 0,00914 | 0,000845917 | 11,24       | T46R        | 0,00066 | 1,52958E-05 |             | 1,36        | 0,1116      |             |        |        |
| T714A    | 0,00378 | 0,000186265 | 4,65        | E62K        | 0,00634 | 0,000590839 | 13,06       | 1,0714      |             |             |        |        |
|          |         |             |             |             | D740H   | 0,00553     | 7,18142E-05 | 11,39       | 0,9342      |             |        |        |

**SUPPLEMENTARY FIGURE 1. Pedigrees of *SIMI* mutated probands presenting with clinical features of PWL syndrome**

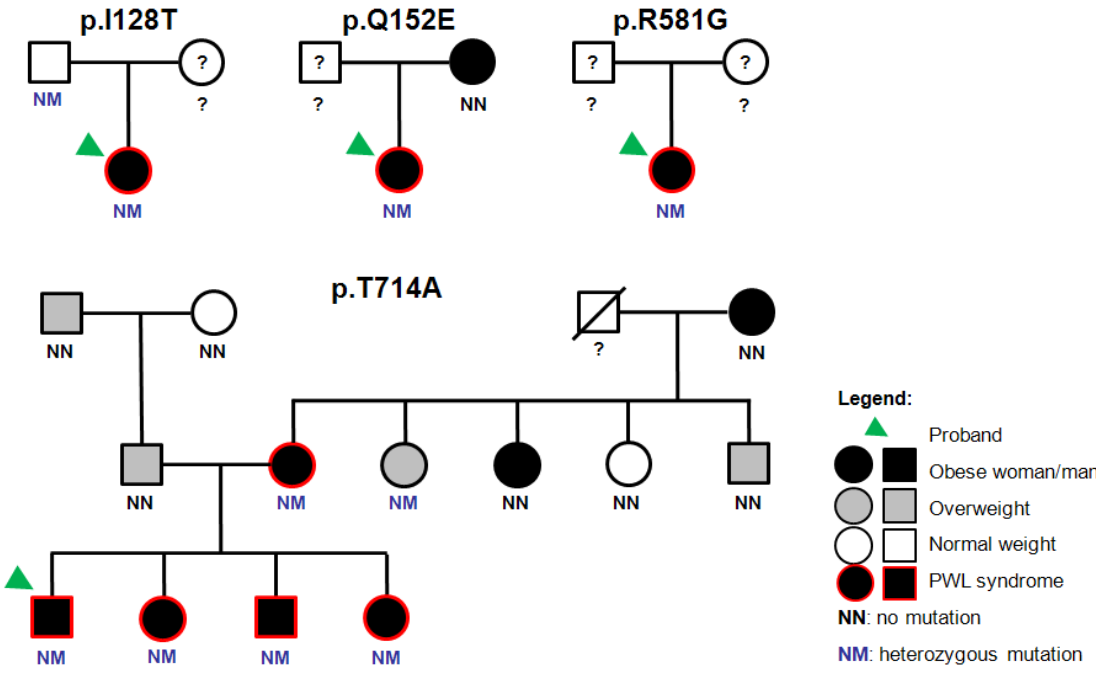

**SUPPLEMENTARY FIGURE 2. Pedigrees of *SIM1* mutated participants presenting with morbid obesity**

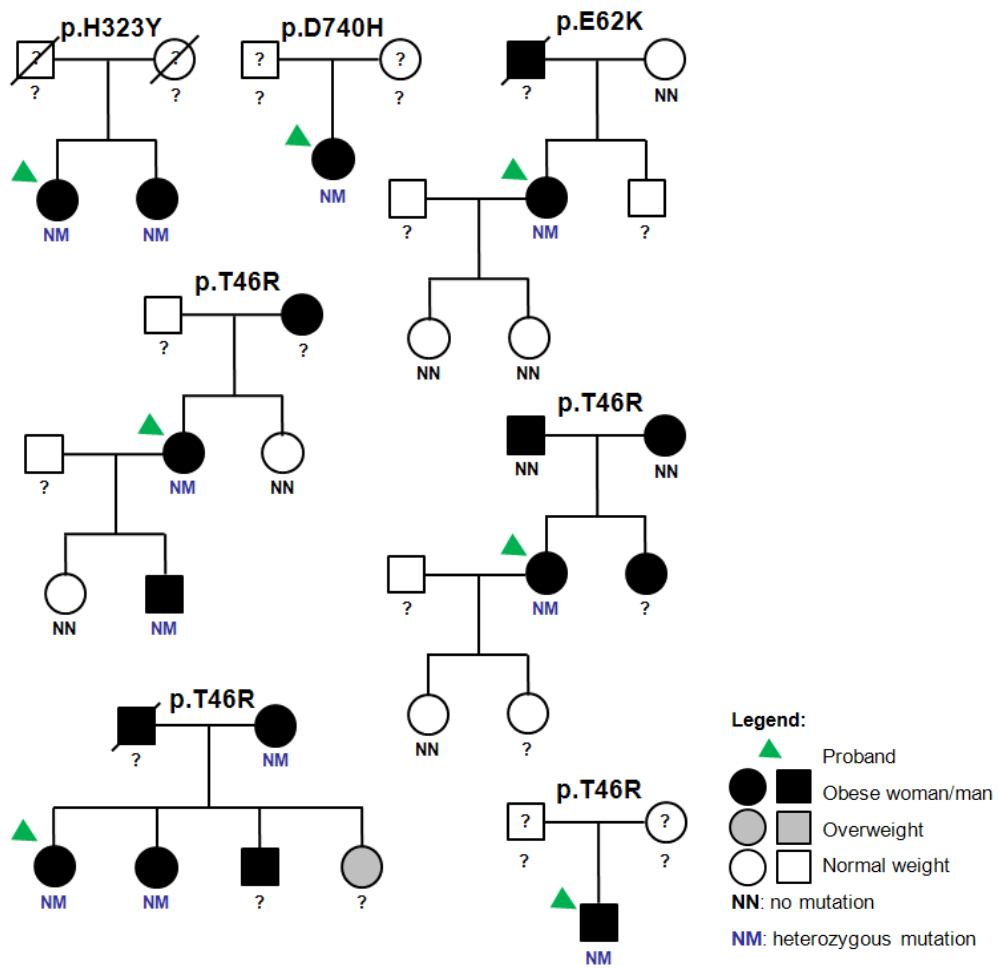

Supplement: JCI68035sd.pdf [file JCI68035sd.pdf]
